# Supplementary material for: VEGF receptor signalling ? in control of vascular function
Source: Springer Nature journal article supplement (doi:10.1038/nrm1911), 2006-04-21
Supplement: 41580_2006_BFnrm1911_MOESM1_ESM.pdf [file 41580_2006_BFnrm1911_MOESM1_ESM.pdf]

**Supplementary information S1 (figure). Schematic outline of VEGFA isoforms.**

Human VEGF isoforms, with exons indicated by numbers. Exon 3 (blue) is primarily involved in VEGF-homodimerization and interactions with VEGFR1. Interactions with VEGFR2 are mainly mediated by exon 4 (green). Binding to the extracellular matrix (heparan sulphate proteoglycans, heparin and neuropilins) is mediated through exons 6 and 7 (yellow and red, respectively). Exon 9 (gray) is expressed in the inhibitory VEGFA165b variant.

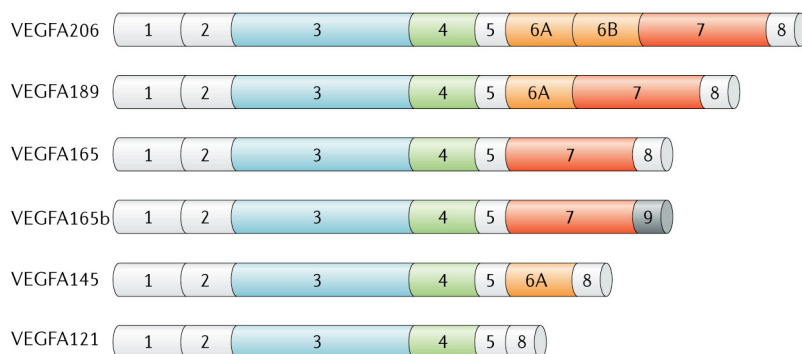

Copyright © 2006 Nature Publishing Group  
 Nature Reviews | **Molecular Cell Biology**
