# Supplementary material for: VEGF receptor signalling ? in control of vascular function
Source: Springer Nature journal article supplement (doi:10.1038/nrm1911), 2006-04-21
Supplement: 41580_2006_BFnrm1911_MOESM2_ESM.pdf [file 41580_2006_BFnrm1911_MOESM2_ESM.pdf]

**Supplementary information S2 (Table).**  
**Expression patterns of VEGF ligands, receptors and co-receptors**

| <i>GENE</i>         | <i>PREDOMINANT EXPRESSION</i>                                                                                                                                               |
|---------------------|-----------------------------------------------------------------------------------------------------------------------------------------------------------------------------|
| <i>VEGFA</i>        | Ubiquitous <sup>1,2</sup>                                                                                                                                                   |
| <i>VEGFB</i>        | Muscle, heart <sup>3</sup>                                                                                                                                                  |
| <i>VEGFC</i>        | Heart, lung, mesenchymal cells <sup>4</sup>                                                                                                                                 |
| <i>VEGFD</i>        | Heart, lung, skeletal muscle, colon, small intestine, mesenchymal cells <sup>5</sup>                                                                                        |
| <i>PLGF</i>         | Placenta, tumour cells <sup>6,7</sup>                                                                                                                                       |
| <i>VEGFR1</i>       | Endothelial cells, monocytes, macrophages, megakaryocytes, smooth muscle cells, osteoclasts <sup>8,9</sup>                                                                  |
| <i>sVEGFR1</i>      | Placenta <sup>10</sup>                                                                                                                                                      |
| <i>VEGFR2</i>       | Endothelial cells (highest expression during development), CD34/AC133-positive bone-marrow precursors, neuronal cells <sup>11</sup>                                         |
| <i>VEGFR3</i>       | Embryonic expression in vascular endothelial cells, fenestrated capillaries, tumour endothelial cells, lymphatic endothelial cells, monocytes, macrophages <sup>12,13</sup> |
| <i>Neuropilin-1</i> | Developing nervous and vascular system, arterial endothelial cells, many non-neuronal adult tissues, bone marrow stromal cells, tumour cells <sup>14-17</sup>               |
| <i>Neuropilin-2</i> | Developing nervous and vascular system, venous and lymphatic endothelial cells, tumour cells <sup>16,18-20</sup>                                                            |

1. Breier, G., Albrecht, U., Sterrer, S. & Risau, W. Expression of vascular endothelial growth factor during embryonic angiogenesis and endothelial cell differentiation. *Development* **114**, 521-32 (1992).
2. Ferrara, N. Molecular and biological properties of vascular endothelial growth factor. *J Mol Med* **77**, 527-43 (1999).
3. Olofsson, B. et al. Vascular endothelial growth factor B, a novel growth factor for endothelial cells. *Proc Natl Acad Sci U S A* **93**, 2576-81 (1996).
4. Kukk, E. et al. VEGF-C receptor binding and pattern of expression with VEGFR-3 suggests a role in lymphatic vascular development. *Development* **122**, 3829-37 (1996).
5. Achen, M.G. et al. Vascular endothelial growth factor D (VEGF-D) is a ligand for the tyrosine kinases VEGF receptor 2 (Flk1) and VEGF receptor 3 (Flt4). *Proc Natl Acad Sci U S A* **95**, 548-53 (1998).
6. DiPalma, T. et al. The placenta growth factor gene of the mouse. *Mamm Genome* **7**, 6-12 (1996).
7. Takahashi, A. et al. Markedly increased amounts of messenger RNAs for vascular endothelial growth factor and placenta growth factor in renal cell carcinoma associated with angiogenesis. *Cancer Res* **54**, 4233-7 (1994).
8. Sawano, A. et al. Flt-1, vascular endothelial growth factor receptor 1, is a novel cell surface marker for the lineage of monocyte-macrophages in humans. *Blood* **97**, 785-91 (2001).
9. Casella, I. et al. Autocrine-paracrine VEGF loops potentiate the maturation of megakaryocytic precursors through Flt1 receptor. *Blood* **101**, 1316-23 (2003).
10. Clark, D.E. et al. A vascular endothelial growth factor antagonist is produced by the human placenta and released into the maternal circulation. *Biol Reprod* **59**, 1540-8 (1998).
11. Asahara, T. et al. VEGF contributes to postnatal neovascularization by mobilizing bone marrow-derived endothelial progenitor cells. *Embo J* **18**, 3964-72 (1999).

12. Partanen, T.A. et al. VEGF-C and VEGF-D expression in neuroendocrine cells and their receptor, VEGFR-3, in fenestrated blood vessels in human tissues. *Faseb J* **14**, 2087-96 (2000).
13. Hamrah, P., Chen, L., Zhang, Q. & Dana, M.R. Novel expression of vascular endothelial growth factor receptor (VEGFR)-3 and VEGF-C on corneal dendritic cells. *Am J Pathol* **163**, 57-68 (2003).
14. Kawakami, A., Kitsukawa, T., Takagi, S. & Fujisawa, H. Developmentally regulated expression of a cell surface protein, neuropilin, in the mouse nervous system. *J Neurobiol* **29**, 1-17 (1996).
15. Soker, S., Takashima, S., Miao, H.Q., Neufeld, G. & Klagsbrun, M. Neuropilin-1 is expressed by endothelial and tumor cells as an isoform-specific receptor for vascular endothelial growth factor. *Cell* **92**, 735-45 (1998).
16. Herzog, Y., Kalcheim, C., Kahane, N., Reshef, R. & Neufeld, G. Differential expression of neuropilin-1 and neuropilin-2 in arteries and veins. *Mech Dev* **109**, 115-9 (2001).
17. Tordjman, R. et al. Neuropilin-1 is expressed on bone marrow stromal cells: a novel interaction with hematopoietic cells? *Blood* **94**, 2301-9 (1999).
18. Giger, R.J. et al. Neuropilin-2 is a receptor for semaphorin IV: insight into the structural basis of receptor function and specificity. *Neuron* **21**, 1079-92 (1998).
19. Gluzman-Poltorak, Z., Cohen, T., Herzog, Y. & Neufeld, G. Neuropilin-2 is a receptor for the vascular endothelial growth factor (VEGF) forms VEGF-145 and VEGF-165 [corrected]. *J Biol Chem* **275**, 18040-5 (2000).
20. Yuan, L. et al. Abnormal lymphatic vessel development in neuropilin 2 mutant mice. *Development* **129**, 4797-806 (2002).
